# Supplementary material for: Radiomics of Liver Metastases: A Systematic Review
Source: MDPI journal article supplement (doi:10.3390/cancers12102881), 2020-10-07
Supplement: s1 [file s1]

# Supplementary Material: Radiomics of Liver Metastases: A Systematic Review

Francesco Fiz, Luca Viganò, Nicolò Gennaro, Guido Costa, Ludovico la Bella, Alexandra Boichuk, Lara Cavinato, Martina Sollini, Letterio S. Politi, Arturo Chiti and Guido Torzilli

**Table S1.** QUADAS-2 evaluation of studies.

[illegible]

|                                                                                                                                                                                                                                                                                       |                                                                                   |                                                                                   |                                                                                   |                                                                                   |                                                                                    |                                                                                     |                                                                                     |
|---------------------------------------------------------------------------------------------------------------------------------------------------------------------------------------------------------------------------------------------------------------------------------------|-----------------------------------------------------------------------------------|-----------------------------------------------------------------------------------|-----------------------------------------------------------------------------------|-----------------------------------------------------------------------------------|------------------------------------------------------------------------------------|-------------------------------------------------------------------------------------|-------------------------------------------------------------------------------------|
| Trebeschi<br>[49]                                                                                                                                                                                                                                                                     |  |  |  |  |  |  |  |
| Van Helden<br>EJ [61]                                                                                                                                                                                                                                                                 |  |  |  |  |  |  |  |
| Velichko YS<br>[50]                                                                                                                                                                                                                                                                   |  |  |  |  |  |  |  |
| Wagner F<br>[60]                                                                                                                                                                                                                                                                      |  |  |  |  |  |  |  |
| Weber M<br>[63]                                                                                                                                                                                                                                                                       |  |  |  |  |  |  |  |
| Zhang H [56]                                                                                                                                                                                                                                                                          |  |  |  |  |  |  |  |
|  Low Risk  High Risk  Unclear Risk |                                                                                   |                                                                                   |                                                                                   |                                                                                   |                                                                                    |                                                                                     |                                                                                     |

**Table S2.** Data about prediction of survival by radiomics in patients with liver metastases from colorectal cancer.

| First Author       | #   | Imaging | Analyzed Imaging | Radiomic Features                                             | Outcome | Data                                                                                                                                                                                                                                                                                                               |
|--------------------|-----|---------|------------------|---------------------------------------------------------------|---------|--------------------------------------------------------------------------------------------------------------------------------------------------------------------------------------------------------------------------------------------------------------------------------------------------------------------|
| Lubner MG [43]     | 77  | CT      | Pre-therapy      | Entropy                                                       | OS      | HR = 0.65, 95%CI = 0.44–0.95, $p=0.03$ at coarse filter level                                                                                                                                                                                                                                                      |
| Simpson AL [47]    | 198 | CT      | Pre-therapy      | Tumor correlation and contrast                                | OS      | HR = 2.35, 95%CI = 1.21–4.55, $p = 0.013$                                                                                                                                                                                                                                                                          |
|                    |     |         |                  | Future liver remnant energy and entropy                       | OS      | HR = 2.15, 95%CI = 1.08–4.29, $p = 0.029$                                                                                                                                                                                                                                                                          |
|                    |     |         |                  |                                                               | HDFS    | HR=2.21, 95%CI=1.21–4.03, $p = 0.010$                                                                                                                                                                                                                                                                              |
| Andersen IR [32]   | 27  | CT      | Pre/post therapy | Uniformity                                                    | OS      | HR ranging from $1.5 \times 10^{20}$ to $1.3 \times 10^{49}$ , according to the filter used                                                                                                                                                                                                                        |
|                    |     |         |                  | Entropy                                                       | OS      | HR ranging from 0.16 to 0.63 according to the filter used                                                                                                                                                                                                                                                          |
|                    |     |         |                  | Standard deviation                                            | OS      | HR ranging from 0.94 to 0.98, according to the filter used                                                                                                                                                                                                                                                         |
| Beckers RCJ [38]   | 70  | CT      | Pre-therapy      | LM/parenchyma entropy ratio                                   | OS      | HR = 1.9, 95%CI = 0.95–3.78, $p = 0.07$                                                                                                                                                                                                                                                                            |
| Dercle L [40]      | 667 | CT      | Pre/post therapy | Signature including Shape SI4, Log Z/X Entropy, GTDM Contrast | OS      | HR = 44.3, 95%CI = 6.4–307.7, $p < 0.001$ for patients with high imaging quality; HR = 6.5, 95%CI = 1.8–23.6, $p = 0.005$ for patients with standard imaging quality                                                                                                                                               |
| Dohan A [33]       | 230 | CT      | Pre/post therapy | SPECTRA score (cut-off 0.02)                                  | OS      | HR = 2.82, 95%CI = 1.85–4.28, median survival 1.210 years, 95%CI 1.035–1.385 vs. 2.497 years, 95%CI = 1.786 to 3.208, $p < 0.0001$ in the training dataset; HR = 2.07, 95%CI = 1.34–3.20, median survival 1.418 years, 95%CI 1.181–1.656 vs 2.289 years, 95%CI 1.698–2.880, $p < 0.0008$ in the validation dataset |
| Rahmim A [59]      | 52  | FDG PET | Pre-therapy      | Heterogeneity (included into a predictive model)              | OS      | HR = 4.29, 95%CI = 2.15–8.57, $p < 0.001$                                                                                                                                                                                                                                                                          |
|                    |     |         |                  | Histogram uniformity (included into a predictive model)       | EFS     | HR = 3.20, 95%CI 1.73–5.94, $p < 0.001$                                                                                                                                                                                                                                                                            |
| Ravanelli M [46]   | 43  | CT      | Pre/post therapy | Uniformity (cut-off $\geq 0.42$ ) in the EGFR group           | OS      | RR = 6.94; 95%CI = 1.79–26.79, $p = 0.005$                                                                                                                                                                                                                                                                         |
|                    |     |         |                  | Density (cut-off $< 53$ HU) in the EGFR group                 | PFS     | RR = 5.05, 95%CI = 1.74–14.66, $p = 0.004$                                                                                                                                                                                                                                                                         |
| Shur J [62]        | 102 | CT; MRI | Pre-surgery      | Minimum pixel value                                           | OS      | RR = 3.7, 95%CI = 1.16–11.76, $p = 0.028$                                                                                                                                                                                                                                                                          |
|                    |     |         |                  | GLSZM small area emphasis                                     | PFS     | HR = 1.66, 95%CI = 1.28–2.16, $p < 0.001$                                                                                                                                                                                                                                                                          |
| Van Helden EJ [61] | 47  | FDG PET | Pre-therapy      | AUC-ISH                                                       | OS      | HR = 0.62, 95%CI = 0.47–0.83, $p = 0.001$                                                                                                                                                                                                                                                                          |
|                    |     |         |                  |                                                               | PFS     | HR = 0.77, 95%CI = 0.66–0.89, $p < 0.01$                                                                                                                                                                                                                                                                           |
|                    |     |         |                  |                                                               |         | HR = 0.86, 95%CI = 0.76–0.97, $p = 0.02$                                                                                                                                                                                                                                                                           |

OS: overall survival, HDFS: hepatic disease-free survival, EFS: event-free survival, PFS: progression-free survival, GLSZM: gray level size zone matrix, GTDM: gray tone difference matrix, AUC-ISH: area-under-the-curve of cumulative SUV/Volume histograms, HR: hazard ratio, 95%CI: 95% confidence intervals; RR: relative risk.

**Table S3.** Data about prediction of response to chemotherapy by radiomics in patients with liver metastases from colorectal cancer.

| First Author       | #   | Imaging | Analyzed Imaging | Radiomic Feature                                              | Outcome     | Data                                                                                                                        |
|--------------------|-----|---------|------------------|---------------------------------------------------------------|-------------|-----------------------------------------------------------------------------------------------------------------------------|
| Ahn SJ [36]        | 235 | CT      | Pre-therapy      | Skewness on 2D                                                | RECIST      | $0.02 \pm 0.32$ in responders vs. $0.33 \pm 0.44$ in non-responders, $p = 0.001$                                            |
|                    |     |         |                  | Mean attenuation in 3D                                        | RECIST      | $82.94 \pm 16.55$ in responders vs. $71.76 \pm 16.71$ in non-responders, $p < 0.001$                                        |
|                    |     |         |                  | Standard deviation on 3D                                      | RECIST      | $21.69 \pm 6.99$ in responders vs. $25.06 \pm 6.39$ in non-responders, $p = 0.001$                                          |
| Beckers RCJ [38]   | 56  | CT      | Pre-therapy      | Entropy                                                       | RECIST      | $6.65 \pm 0.26$ in responders vs. $6.51 \pm 0.34$ in non-responders, $p = 0.08$                                             |
| Dercle L [40]      | 667 | CT      | Pre/post therapy | Signature including Shape SI4, Log Z/X Entropy, GTDM Contrast | RECIST      | AUC = 0.80, 95%CI = 0.69–0.94 for patients with high imaging quality                                                        |
|                    |     |         |                  |                                                               |             | AUC = 0.72, 95%CI = 0.59–0.83 for patients with standard imaging quality                                                    |
| Liang HY [54]      | 53  | MRI     | Pre-therapy      | Mean ADC values (cut-off 123.8)                               | RECIST      | AUC = 0.79, 95%CI = 0.66–0.89, $p = 0.001$                                                                                  |
|                    |     |         |                  |                                                               |             | ADC value $104.3 \pm 30.5$ in responders vs. $150.1 \pm 46.1$ in non-responders                                             |
| Rao SX [45]        | 21  | CT      | Pre/post therapy | Entropy variation after treatment                             | TRG         | $-5.13$ in responders vs. $+1.27$ in non-responders, OR = 1.34, 95%CI = 0.92–1.93                                           |
|                    |     |         |                  | Uniformity variation after treatment                          | TRG         | $+30.84$ in responders vs. $-0.44$ in non-responders, OR = 0.95, 95%CI = 0.89–1.01                                          |
| Ravanelli M. [46]  | 43  | CT      | Pre/post therapy | Uniformity (cut-off $\geq 0.42$ ) in EGFR patients            | RECIST      | OR = 20, 95%CI = 1.85–217.4, $p = 0.01$                                                                                     |
| Van Helden EJ [61] | 47  | FDG PET | Pre-therapy      | Entropy                                                       | RECIST      | AUC = 0.74, 95%CI = 0.52–0.97                                                                                               |
| Zhang H [56]       | 26  | MRI     | Pre-therapy      | Variance                                                      | Size change | $446.07 \pm 329.60$ in responders vs. $210.23 \pm 183.39$ in non-responders, $p < 0.001$ , AUC = 0.729 95%CI = 0.661–0.790; |
|                    |     |         |                  | Angular second moment                                         | Size change | $0.96 \pm 0.02$ in responders vs. $0.98 \pm 0.01$ in non-responders $p < 0.001$ , AUC = 0.773, 95%CI = 0.707–0.830          |

Andersen IR et al. study [32] and Dohan A [33] have a complex results presentation that cannot be summarized in this table. Please refer to the original papers for details. RECIST: response evaluation criteria in solid tumors, TRG: tumor regression grade, GTDM: gray tone difference matrix, ADC: apparent diffusion coefficient, AUC: area under the curve, OR: odds ratio, 95%CI: 95% confidence intervals.

1

Table S4. PRISMA checklist.

| Section/Topic                      | #  | Checklist Item                                                                                                                                                                                                                                                                                              | Reported on Page #         |
|------------------------------------|----|-------------------------------------------------------------------------------------------------------------------------------------------------------------------------------------------------------------------------------------------------------------------------------------------------------------|----------------------------|
| <b>Title</b>                       |    |                                                                                                                                                                                                                                                                                                             |                            |
| Title                              | 1  | Identify the report as a systematic review, meta-analysis, or both.                                                                                                                                                                                                                                         | Title page                 |
| <b>Abstract</b>                    |    |                                                                                                                                                                                                                                                                                                             |                            |
| Structured summary                 | 2  | Provide a structured summary including, as applicable: background; objectives; data sources; study eligibility criteria, participants, and interventions; study appraisal and synthesis methods; results; limitations; conclusions and implications of key findings; systematic review registration number. | Title page                 |
| <b>Introduction</b>                |    |                                                                                                                                                                                                                                                                                                             |                            |
| Rationale                          | 3  | Describe the rationale for the review in the context of what is already known.                                                                                                                                                                                                                              | 2                          |
| Objectives                         | 4  | Provide an explicit statement of questions being addressed with reference to participants, interventions, comparisons, outcomes, and study design (PICOS).                                                                                                                                                  | N/A                        |
| <b>Methods</b>                     |    |                                                                                                                                                                                                                                                                                                             |                            |
| Protocol and registration          | 5  | Indicate if a review protocol exists, if and where it can be accessed (e.g., Web address), and, if available, provide registration information including registration number.                                                                                                                               | 18                         |
| Eligibility criteria               | 6  | Specify study characteristics (e.g., PICOS, length of follow-up) and report characteristics (e.g., years considered, language, publication status) used as criteria for eligibility, giving rationale.                                                                                                      | N/A                        |
| Information sources                | 7  | Describe all information sources (e.g., databases with dates of coverage, contact with study authors to identify additional studies) in the search and date last searched.                                                                                                                                  | Title page, 18             |
| Search                             | 8  | Present full electronic search strategy for at least one database, including any limits used, such that it could be repeated.                                                                                                                                                                               | 18                         |
| Study selection                    | 9  | State the process for selecting studies (i.e., screening, eligibility, included in systematic review, and, if applicable, included in the meta-analysis).                                                                                                                                                   | 18                         |
| Data collection process            | 10 | Describe method of data extraction from reports (e.g., piloted forms, independently, in duplicate) and any processes for obtaining and confirming data from investigators.                                                                                                                                  | 18                         |
| Data items                         | 11 | List and define all variables for which data were sought (e.g., PICOS, funding sources) and any assumptions and simplifications made.                                                                                                                                                                       | 18                         |
| Risk of bias in individual studies | 12 | Describe methods used for assessing risk of bias of individual studies (including specification of whether this was done at the study or outcome level), and how this information is to be used in any data synthesis.                                                                                      | 18                         |
| Summary measures                   | 13 | State the principal summary measures (e.g., risk ratio, difference in means).                                                                                                                                                                                                                               | 18-19                      |
| Synthesis of results               | 14 | Describe the methods of handling data and combining results of studies, if done, including measures of consistency (e.g., $I^2$ ) for each meta-analysis.                                                                                                                                                   | N/A                        |
| Risk of bias across studies        | 15 | Specify any assessment of risk of bias that may affect the cumulative evidence (e.g., publication bias, selective reporting within studies).                                                                                                                                                                | 5-6; Supplementary Table 1 |
| Additional analyses                | 16 | Describe methods of additional analyses (e.g., sensitivity or subgroup analyses, meta-regression), if done, indicating which were pre-specified.                                                                                                                                                            | N/A                        |

2

3

Table S4. Cont.

| Results                       |    |                                                                                                                                                                                                          |                            |
|-------------------------------|----|----------------------------------------------------------------------------------------------------------------------------------------------------------------------------------------------------------|----------------------------|
| Study selection               | 17 | Give numbers of studies screened, assessed for eligibility, and included in the review, with reasons for exclusions at each stage, ideally with a flow diagram.                                          | 3                          |
| Study characteristics         | 18 | For each study, present characteristics for which data were extracted (e.g., study size, PICOS, follow-up period) and provide the citations.                                                             | N/A                        |
| Risk of bias within studies   | 19 | Present data on risk of bias of each study and, if available, any outcome level assessment (see item 12).                                                                                                | 5-6, Supplementary Table 1 |
| Results of individual studies | 20 | For all outcomes considered (benefits or harms), present, for each study: (a) simple summary data for each intervention group (b) effect estimates and confidence intervals, ideally with a forest plot. | N/A                        |
| Synthesis of results          | 21 | Present results of each meta-analysis done, including confidence intervals and measures of consistency.                                                                                                  | N/A                        |
| Risk of bias across studies   | 22 | Present results of any assessment of risk of bias across studies (see Item 15).                                                                                                                          | 5-6, Supplementary Table 1 |
| Additional analysis           | 23 | Give results of additional analyses, if done (e.g., sensitivity or subgroup analyses, meta-regression [see Item 16]).                                                                                    | N/A                        |
| Discussion                    |    |                                                                                                                                                                                                          |                            |
| Summary of evidence           | 24 | Summarize the main findings including the strength of evidence for each main outcome; consider their relevance to key groups (e.g., healthcare providers, users, and policy makers).                     | 16                         |
| Limitations                   | 25 | Discuss limitations at study and outcome level (e.g., risk of bias), and at review-level (e.g., incomplete retrieval of identified research, reporting bias).                                            | 16-17                      |
| Conclusions                   | 26 | Provide a general interpretation of the results in the context of other evidence, and implications for future research.                                                                                  | 19                         |
| Funding                       |    |                                                                                                                                                                                                          |                            |
| Funding                       | 27 | Describe sources of funding for the systematic review and other support (e.g., supply of data); role of funders for the systematic review.                                                               | 20                         |

4 From: Moher D, Liberati A, Tetzlaff J, Altman DG, The PRISMA Group (2009). Preferred Reporting Items for  
 5 Systematic Reviews and Meta-Analyses: The PRISMA Statement. PLoS Med 6(7): e1000097.  
 6 doi:10.1371/journal.pmed1000097. For more information, visit: [www.prisma-statement.org](http://www.prisma-statement.org).

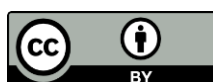

© 2020 by the authors. Licensee MDPI, Basel, Switzerland. This article is an open access article distributed under the terms and conditions of the Creative Commons Attribution (CC BY) license (<http://creativecommons.org/licenses/by/4.0/>).

7
